# Supplementary material
Source: PubMed Central journal article supplement (PMC4874558)
Supplement: NIHMS770797-supplement-Figures_4_and_5_Permission.pdf [file NIHMS770797-supplement-Figures_4_and_5_Permission.pdf]

## Medical Center

In the tradition of the Medical College of Virginia

February 10, 2016

RE: CIRCHF/2015/002558R1

Transthyretin Cardiac Amyloidosis in Black Americans

Dear Dr. Udelson,

I give permission to Keyur Shah and his co-authors to publish images I have furnished in Figures 4 and 5 in the manuscript referenced above.

Sincerely,

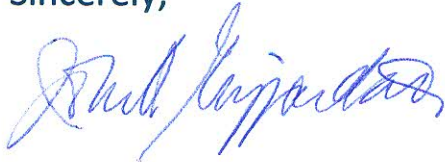

John D. Grizzard, M.D.

**Diagnostic Radiology**  
Emergency Radiology Section

Main Hospital, 3rd Floor  
1250 East Marshall Street  
P.O. Box 980615  
Richmond, Virginia 23298-0615

804 828-0552  
Fax: 804 628-1132  
TDD: 1-800-828-1120  
[www.radiology.vcu.edu](http://www.radiology.vcu.edu)
